# Supplementary material
Source: PubMed Central journal article supplement (PMC7429342)
Supplement: NIHMS1599245-supplement-Supporting_Information.pdf [file NIHMS1599245-supplement-Supporting_Information.pdf]

# Glycopeptide Biomarkers in Serum Haptoglobin for Hepatocellular Carcinoma Detection in Patients with Non-Alcoholic Steatohepatitis

Jianhui Zhu<sup>1</sup>, Junfeng Huang<sup>2</sup>, Jie Zhang<sup>1</sup>, Zhengwei Chen<sup>2</sup>, Yu Lin<sup>1</sup>, Gabriela Grigorean<sup>3</sup>, Lingjun Li<sup>2,4</sup>, Suyu Liu<sup>5</sup>, Amit G. Singal<sup>6</sup>, Neehar D. Parikh<sup>7</sup>, and David M. Lubman<sup>1\*</sup>

## Supporting Information

### Table of Contents

**Figure S1.** Representative extracted ion chromatograms (XICs) of MS/MS spectra of the HexNAc<sup>+</sup> ion within the m/z range 204.085-204.089.

**Figure S2.** Representative MS/MS spectra of *N*-glycopeptides of VVLHPN<sup>241</sup>YSQVDIGLIK with the glycan A4G4S4 (A) and A4G4F2S3 (B) to elucidate the difference in MS2 spectrum caused by the change in glycan moiety between 1 sialic acid and 2 fucoses.

**Figure S3.** (A) Scatter plot of the relative abundance of the *N*-glycopeptide N241\_A4G4F2S4 in HCC and cirrhosis, respectively. (B) ROC curves of the *N*-glycopeptide N241\_A4G4F2S4 and its combination with AFP to differentiate HCCs from cirrhosis patients.

**Figure S4.** The correlation plot of the differentially expressed *N*-glycopeptides at sites N184 and N241.

**Figure S5.** 2D scatter plots of AFP value against Hp *N*-glycopeptides N184\_A3G3F1S3 and N184\_A4G4F1S2, respectively, in cirrhosis (*blue*) and HCC (*red*) patients with AFP < 20 ng/mL.

**Table S1.** An *N*-glycan database containing 53 human *N*-glycans used in this study.

**Table S2.** List of the relative abundance of site-specific *N*-glycopeptides identified at sites N184 and N241 of serum Hp in individual HCC and cirrhosis patients, respectively. Mean value in each group, SD, and p-value are also provided.

**Table S3.** List of the relative abundance of *N*-glycopeptides identified at site N207 of serum Hp in individual HCC and cirrhosis patients, respectively.

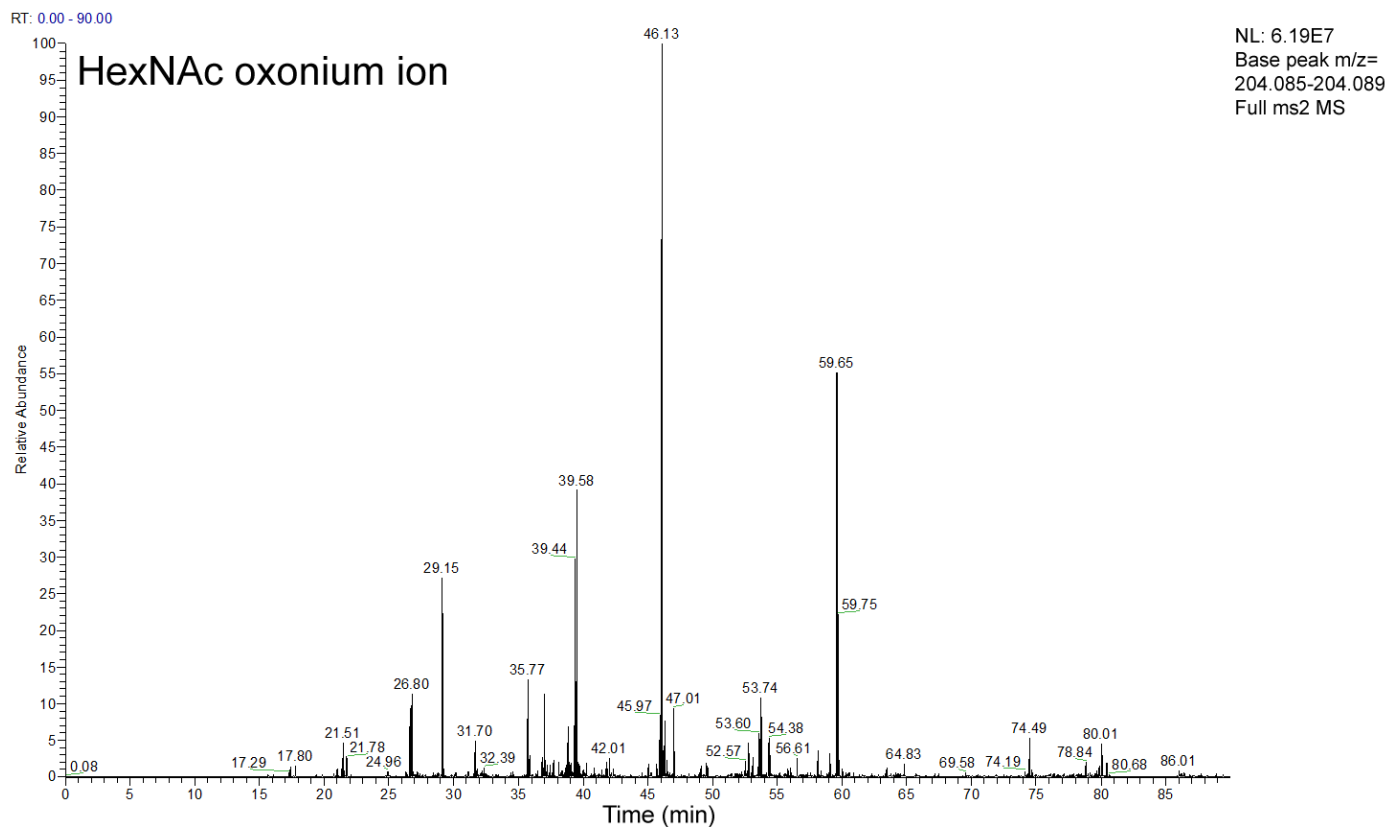

**Figure S1.** Representative extracted ion chromatograms (XICs) of MS/MS spectra of the HexNAc<sup>+</sup> ion within the m/z range 204.085-204.089. The major peaks correspond to the HexNAc<sup>+</sup> ion derived from glycopeptides of MVSHN<sup>184</sup>LTTGATLINE (~29 and ~39 min), NLFLN<sup>207</sup>HSE (~36 min), VVLHPN<sup>241</sup>YSQVD (~46 min) and VVLHPN<sup>241</sup>YSQVDIGLIK (~60 min), respectively. The short peptide N<sup>211</sup>ATAK was difficult to detect by RP C18 chromatography due to its high hydrophilicity.

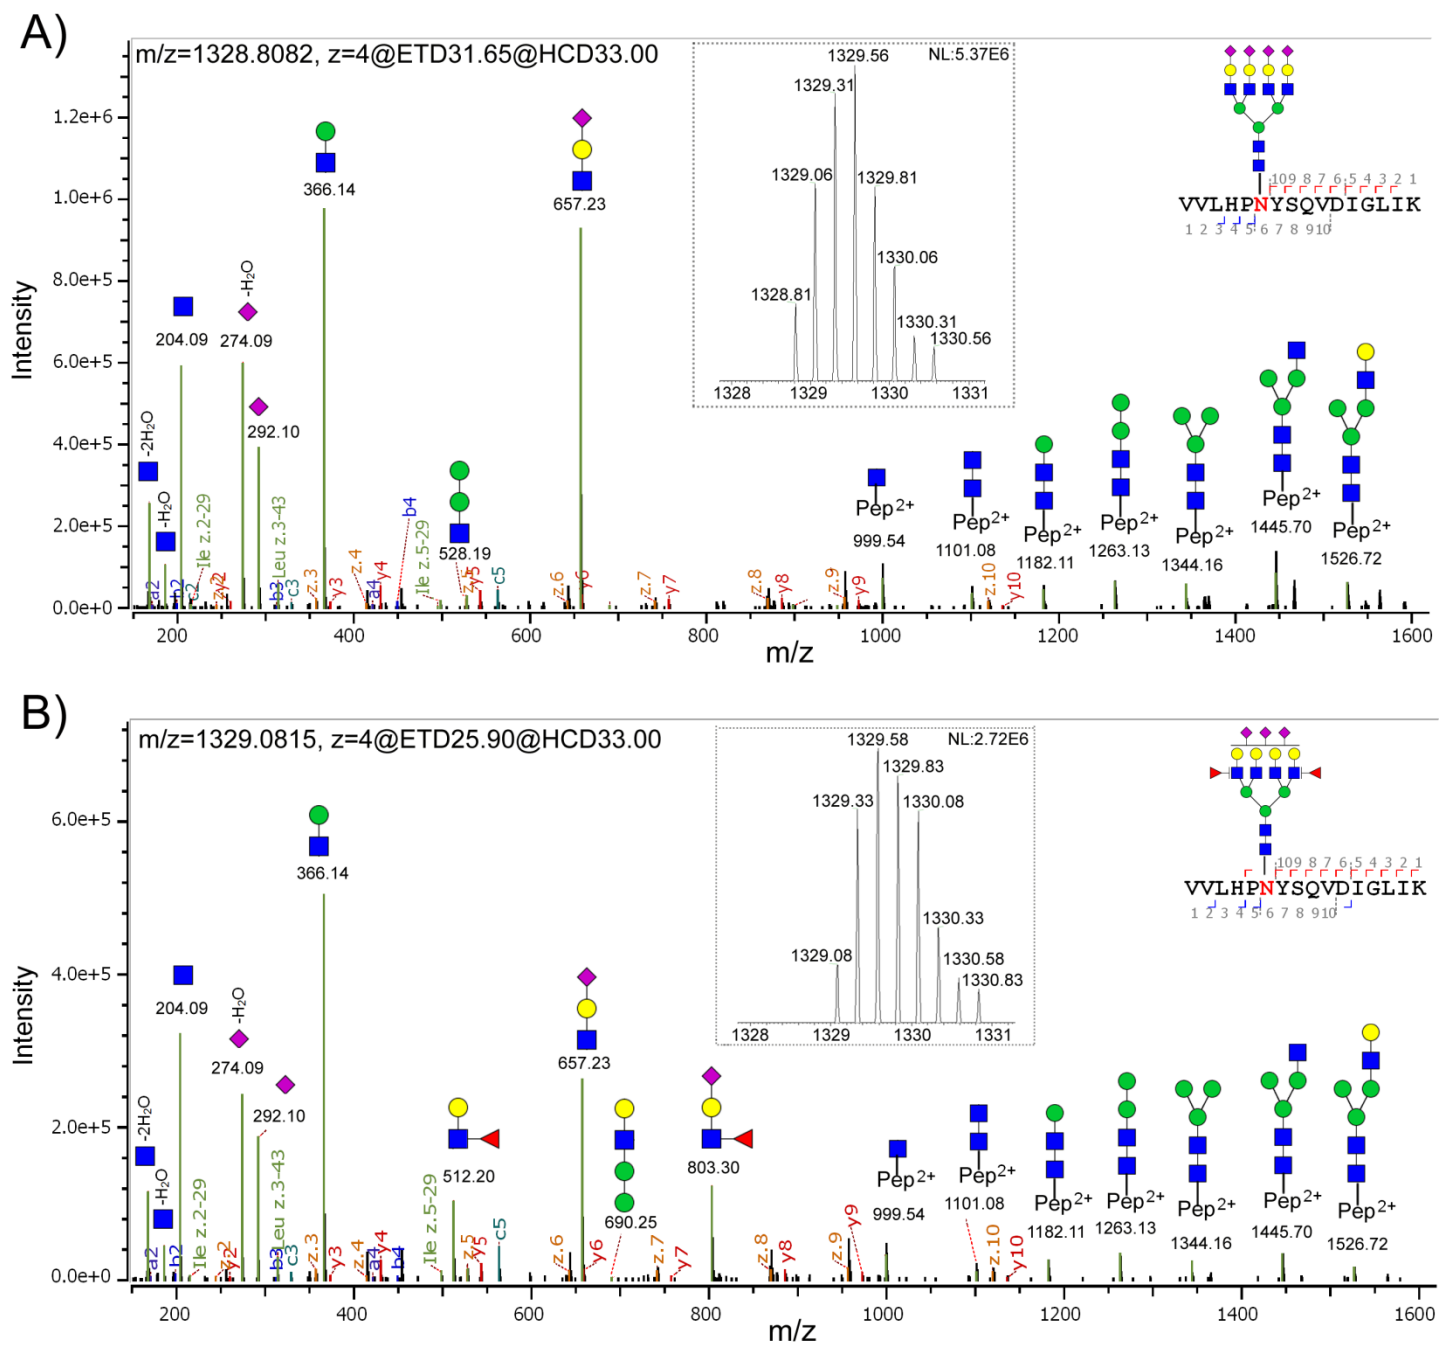

**Figure S2.** Representative MS/MS spectra of *N*-glycopeptides of VVLHPN<sup>241</sup>YSQVDIGLIK with the glycan A4G4S4 (A) and A4G4F2S3 (B) to elucidate the difference in MS2 spectrum caused by the change in glycan moiety between 1 sialic acid and 2 fucoses. In the case of 2Fuc-1.02 = 1NeuAc, the monoisotopic evidence of the precursor ions at  $m/z$  1328.81 and  $m/z$  1329.08 (inserts in A and B) was used to confirm the assignment. Specific diagnostic fragment ions at  $m/z$  512.20 and  $m/z$  803.30 (B) further confirmed the outer arm fucosylation. (The symbols used in the structural formulas: blue square = GlcNAc; green circle = Man; yellow circle = Gal; red triangle = Fuc; purple diamond = NeuAc)

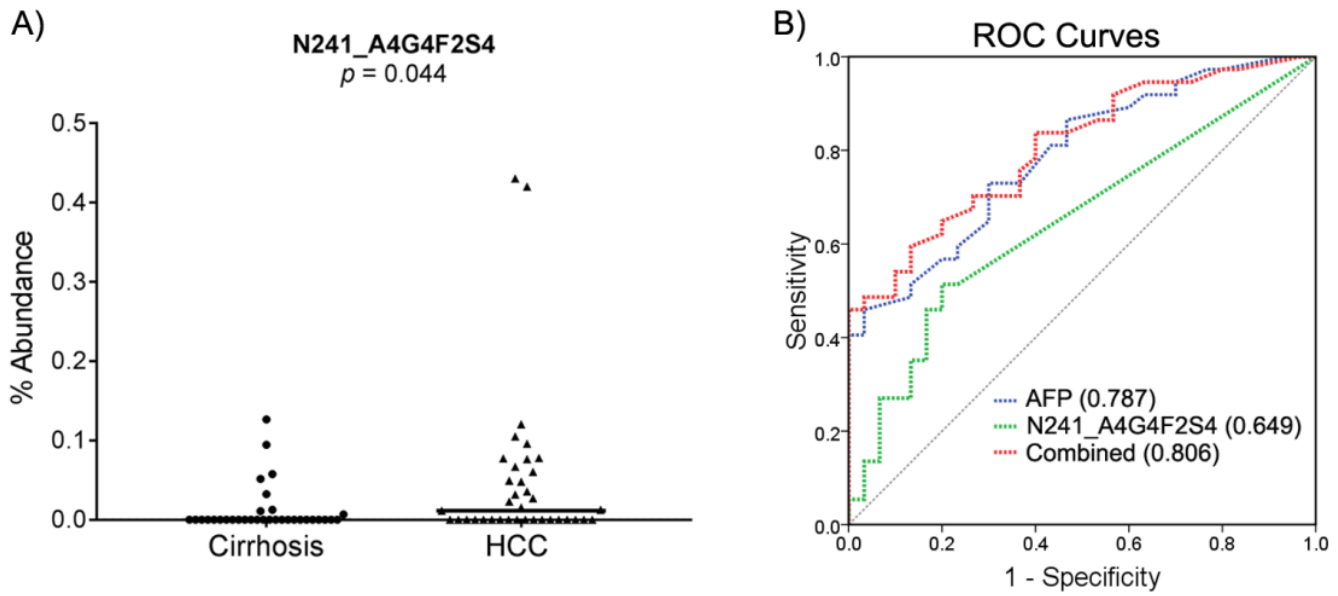

**Figure S3.** (A) Scatter plot of the relative abundance of the *N*-glycopeptide N241\_A4G4F2S4 in HCC and cirrhosis, respectively. (B) ROC curves of the *N*-glycopeptide N241\_A4G4F2S4 and its combination with AFP to differentiate HCCs from cirrhosis patients.

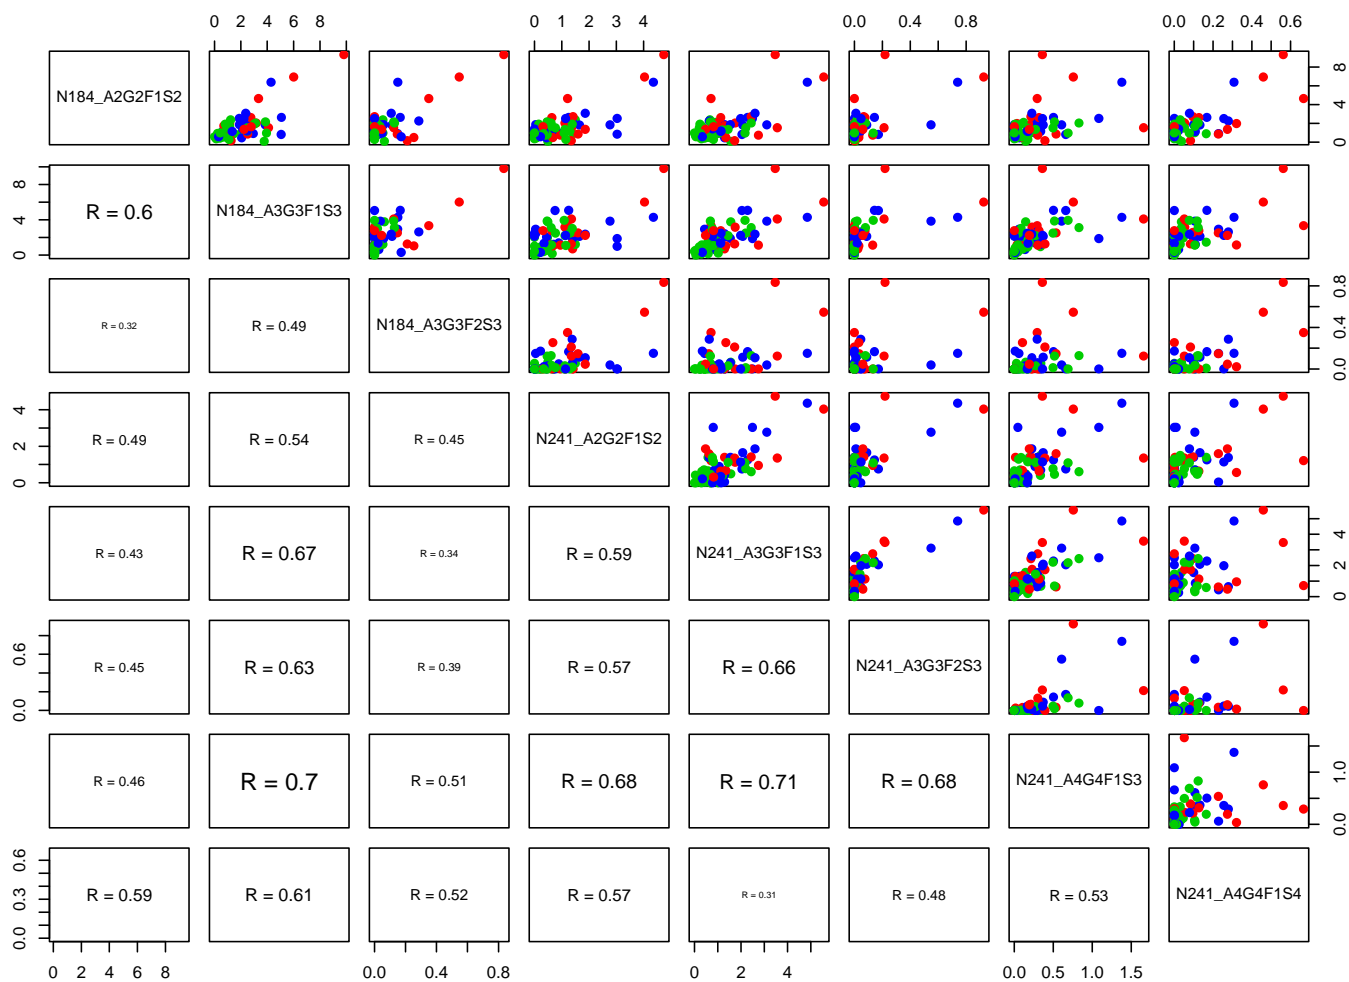

**Figure S4.** The correlation plot of the differentially expressed *N*-glycopeptides at sites N184 and N241. The Spearman correlation coefficients are labeled on the lower panels, and the size of the text is proportional to the correlations. The color of the dots represents the diagnosis (green=cirrhosis control, blue=early HCC, red=late HCC). N241\_A4G4F1S3 was highly correlated with N241\_A3G3F1S3 and N184\_A3G3F1S3, with the correlation coefficients greater than or equal to 0.7.

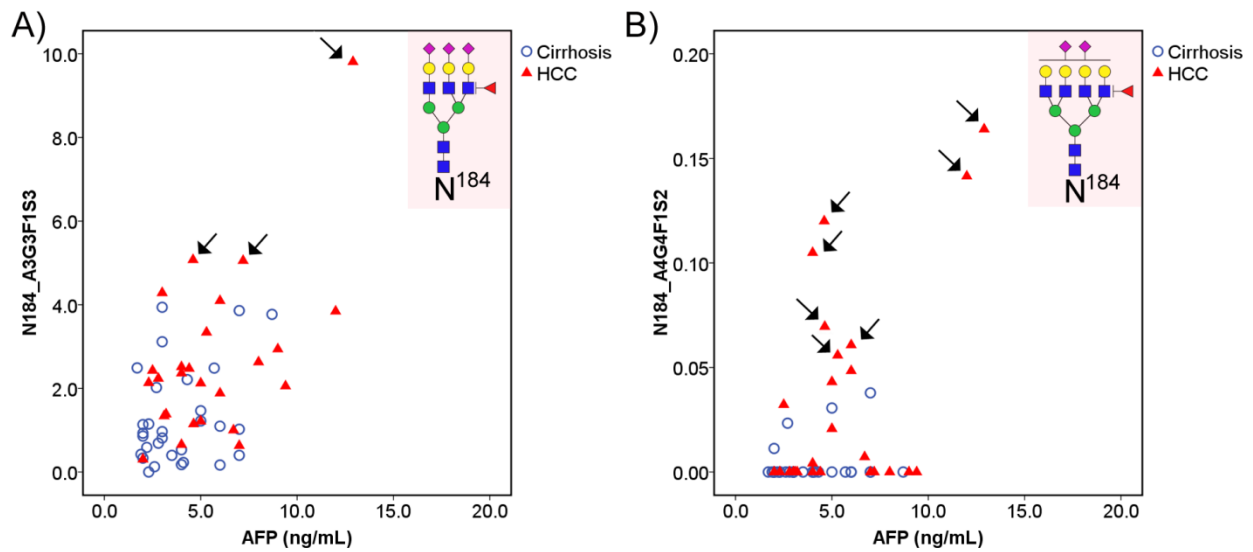

**Figure S5.** 2D scatter plot of AFP value against Hp *N*-glycopeptides N184\_A3G3F1S3 and N184\_A4G4F1S2, respectively, in cirrhosis (*blue*) and HCC (*red*) patients with AFP < 20 ng/mL. HCC patients with negative AFP but elevated level of Hp *N*-glycopeptide are marked with arrows.

**Table S1.** An *N*-glycan database containing 53 human *N*-glycans employed in this study.

| <b>N-glycans</b>              | <b>M-H<sub>2</sub>O</b> |
|-------------------------------|-------------------------|
| HexNAc(3)Hex(3)               | 1095.3966               |
| HexNAc(3)Hex(4)               | 1257.4494               |
| HexNAc(3)Hex(4)Fuc(1)NeuAc(1) | 1694.6027               |
| HexNAc(3)Hex(4)NeuAc(1)       | 1548.5448               |
| HexNAc(4)Hex(3)Fuc(1)         | 1444.5339               |
| HexNAc(4)Hex(4)               | 1460.5288               |
| HexNAc(4)Hex(4)Fuc(1)         | 1606.5867               |
| HexNAc(4)Hex(4)Fuc(2)NeuAc(1) | 2043.7400               |
| HexNAc(4)Hex(4)NeuAc(1)       | 1751.6242               |
| HexNAc(4)Hex(5)               | 1622.5816               |
| HexNAc(4)Hex(5)Fuc(1)NeuAc(1) | 2059.7349               |
| HexNAc(4)Hex(5)Fuc(1)NeuAc(2) | 2350.8304               |
| HexNAc(4)Hex(5)Fuc(2)NeuAc(1) | 2205.7928               |
| HexNAc(4)Hex(5)NeuAc(1)       | 1913.6770               |
| HexNAc(4)Hex(5)NeuAc(2)       | 2204.7724               |
| HexNAc(4)Hex(6)Fuc(1)NeuAc(1) | 2221.7878               |
| HexNAc(4)Hex(6)NeuAc(1)       | 2075.7299               |
| HexNAc(5)Hex(4)NeuAc(1)       | 1954.7036               |
| HexNAc(5)Hex(4)NeuAc(2)       | 2245.7990               |
| HexNAc(5)Hex(5)Fuc(1)NeuAc(1) | 2262.8143               |
| HexNAc(5)Hex(5)Fuc(1)NeuAc(2) | 2553.9097               |
| HexNAc(5)Hex(5)NeuAc(2)       | 2407.8518               |
| HexNAc(5)Hex(6)Fuc(1)         | 2133.7717               |
| HexNAc(5)Hex(6)Fuc(1)NeuAc(1) | 2424.8671               |
| HexNAc(5)Hex(6)Fuc(1)NeuAc(2) | 2715.9626               |
| HexNAc(5)Hex(6)Fuc(1)NeuAc(3) | 3007.0580               |
| HexNAc(5)Hex(6)Fuc(2)NeuAc(1) | 2570.9250               |
| HexNAc(5)Hex(6)Fuc(2)NeuAc(2) | 2862.0204               |
| HexNAc(5)Hex(6)Fuc(2)NeuAc(3) | 3153.1158               |
| HexNAc(5)Hex(6)Fuc(3)NeuAc(1) | 2716.9829               |
| HexNAc(5)Hex(6)Fuc(4)NeuAc(1) | 2863.0408               |
| HexNAc(5)Hex(6)NeuAc(1)       | 2278.8092               |
| HexNAc(5)Hex(6)NeuAc(2)       | 2569.9046               |
| HexNAc(5)Hex(6)NeuAc(3)       | 2861.0001               |
| HexNAc(6)Hex(6)Fuc(1)NeuAc(2) | 2919.0419               |
| HexNAc(6)Hex(6)NeuAc(1)       | 2481.8886               |
| HexNAc(6)Hex(7)Fuc(1)NeuAc(1) | 2789.9993               |
| HexNAc(6)Hex(7)Fuc(1)NeuAc(2) | 3081.0947               |
| HexNAc(6)Hex(7)Fuc(1)NeuAc(3) | 3372.1902               |

|                               |           |
|-------------------------------|-----------|
| HexNAc(6)Hex(7)Fuc(1)NeuAc(4) | 3663.2856 |
| HexNAc(6)Hex(7)Fuc(2)NeuAc(1) | 2936.0572 |
| HexNAc(6)Hex(7)Fuc(2)NeuAc(2) | 3227.1526 |
| HexNAc(6)Hex(7)Fuc(2)NeuAc(3) | 3518.2480 |
| HexNAc(6)Hex(7)Fuc(2)NeuAc(4) | 3809.3434 |
| HexNAc(6)Hex(7)Fuc(3)NeuAc(1) | 3082.1151 |
| HexNAc(6)Hex(7)Fuc(3)NeuAc(3) | 3664.3059 |
| HexNAc(6)Hex(7)Fuc(4)NeuAc(1) | 3228.1730 |
| HexNAc(6)Hex(7)Fuc(5)NeuAc(1) | 3374.2309 |
| HexNAc(6)Hex(7)NeuAc(1)       | 2643.9414 |
| HexNAc(6)Hex(7)NeuAc(2)       | 2935.0368 |
| HexNAc(6)Hex(7)NeuAc(3)       | 3226.1323 |
| HexNAc(6)Hex(7)NeuAc(4)       | 3517.2277 |
| HexNAc(7)Hex(8)NeuAc(1)       | 3009.0736 |
